# Supplementary material for: Self-harm and rurality in Canada: an analysis of hospitalization data from 2015 to 2019
Source: Springer Nature journal article supplement (doi:10.1007/s00127-023-02463-7), 2023-04-08
Supplement: MOESM1 [file 25221334]

## Supplementary Tables

### Title

Self-harm and rurality in Canada: an analysis of hospitalization data from 2015-2019

### Authors

Newsha Mahinpey MPH 1, 2, Nathaniel J. Pollock PhD 1, 3, Li Liu PhD 1, Gisèle Contreras MSc 1, Wendy Thompson MSc 1

**Supplemental Table 1** Age-specific self-harm hospitalization per 100,000 population by sex and age group, Canada (excluding Quebec, Northwest Territories, and Yukon) 2015-2019

|                    | <b>Both sexes combined</b> | <b>Female</b>       | <b>Male</b>      |
|--------------------|----------------------------|---------------------|------------------|
| <b>Age Group</b>   | (95%CI)                    | (95%CI)             | (95%CI)          |
| <b>10-14</b>       | 58.8 (57.1-60.5)           | 106.2 (102.9-109.4) | 13.2 (12.1-14.3) |
| <b>15-19</b>       | 166.2 (163.4-168.9)        | 266.4 (261.3-271.4) | 71.9 (69.3-74.4) |
| <b>20-24</b>       | 91.4 (89.5-93.3)           | 126.0 (122.7-129.2) | 59.7 (57.6-61.9) |
| <b>25-29</b>       | 63.5 (61.9-65.0)           | 76.4 (73.9-78.8)    | 51.2 (49.2-53.1) |
| <b>30-34</b>       | 52.2 (50.8-53.7)           | 60.4 (58.2-62.5)    | 44.2 (42.3-46.0) |
| <b>35-39</b>       | 48.6 (47.2-50.0)           | 54.4 (52.3-56.4)    | 42.7 (40.8-44.5) |
| <b>40-44</b>       | 47.8 (46.3-49.2)           | 52.8 (50.7-54.9)    | 42.5 (40.6-44.4) |
| <b>45-49</b>       | 48.6 (47.2-50.0)           | 57.3 (55.2-59.4)    | 39.8 (38.0-41.6) |
| <b>50-54</b>       | 47.3 (46.0-48.6)           | 53.0 (51.0-55.0)    | 41.6 (39.8-43.3) |
| <b>55-59</b>       | 39.2 (38.0-40.5)           | 42.8 (41.0-44.5)    | 35.7 (34.0-37.3) |
| <b>60-64</b>       | 30.1 (29.0-31.2)           | 31.8 (30.2-33.5)    | 28.3 (26.7-29.9) |
| <b>65-69</b>       | 23.3 (22.2-24.4)           | 24.5 (23.0-26.1)    | 22.0 (20.5-23.6) |
| <b>70-74</b>       | 19.9 (18.8-21.1)           | 19.5 (18.0-21.1)    | 20.4 (18.7-22.1) |
| <b>75-79</b>       | 19.9 (18.5-21.2)           | 18.5 (16.7-20.3)    | 21.4 (19.3-23.5) |
| <b>80-84</b>       | 17.1 (15.6-18.6)           | 15.6 (13.7-17.6)    | 19.0 (16.6-21.5) |
| <b>85-89</b>       | 21.6 (19.5-23.7)           | 15.9 (13.5-18.2)    | 30.4 (26.4-34.4) |
| <b>90 and over</b> | 22.5 (19.8-25.3)           | 17.0 (14.1-19.8)    | 35.2 (29.0-41.5) |

Abbreviations: CI= Confidence interval

**Supplemental Table 2** Age-standardized self-harm hospitalization rate per 100,000 population by level of rurality, Canada (excluding Quebec, Northwest Territories, and Yukon) 2015-2019

| <b>Level of Rurality</b> | <b>Both sexes combined (95%CI)</b> | <b>Female (95%CI)</b> | <b>Male (95%CI)</b> |
|--------------------------|------------------------------------|-----------------------|---------------------|
| <b>Easily accessible</b> | 39.6 (39.2-40.0)                   | 49.6 (48.9-50.3)      | 29.1 (28.6-29.6)    |
| <b>Accessible</b>        | 68.4 (67.4-69.4)                   | 87.68 (86.1-89.3)     | 48.1 (46.9-49.3)    |
| <b>Less accessible</b>   | 85.7 (83.9-87.6)                   | 110.4 (107.4-113.4)   | 59.8 (57.6-62.0)    |
| <b>Remote</b>            | 113.1 (110.0-116.2)                | 153.7 (148.6-158.8)   | 70.4 (67.0-73.8)    |
| <b>Very Remote</b>       | 221.8 (212.6-231.0)                | 304.2 (289.2-319.2)   | 135.2 (125.0-145.5) |

Abbreviations: CI= Confidence interval

**Supplemental Table 3** Age specific self-harm hospitalization rate per 100,000 population for females and males by age group and level of rurality, Canada (excluding Quebec, Northwest Territories, and Yukon) 2015-2019

| Age Group    | Level of Rurality | Female rate (95%CI)  | Female RR (95%CI) | Male rate (95%CI)   | Male RR (95%CI) |
|--------------|-------------------|----------------------|-------------------|---------------------|-----------------|
| <b>10-19</b> | Easily accessible | 132.4 (129.2-135.6)  | ref               | 30.2 (28.7-31.7)    | ref             |
|              | Accessible        | 221.8 (214.7-228.9)  | 1.7 (1.6-1.7)     | 49.7 (46.5-53.0)    | 1.6 (1.5-1.8)   |
|              | Less accessible   | 280.1 (268.0-294.0)  | 2.1 (2.0-2.2)     | 67.8 (61.6-74.0)    | 2.2 (2-2.5)     |
|              | Remote            | 428.2 (405.8-450.7)  | 3.2 (3.1-3.4)     | 90.6 (80.5-100.6)   | 3.0 (2.7-3.4)   |
|              | Very Remote       | 968.3 (903.2-1033.3) | 7.3 (6.8-7.9)     | 249.7 (217.5-281.8) | 8.3 (7.2-9.5)   |
| <b>20-34</b> | Easily accessible | 58.7 (57.2-60.2)     | ref               | 35.2 (34.1-36.4)    | ref             |
|              | Accessible        | 113.5 (109.7-117.3)  | 1.9 (1.9-2.0)     | 65.0 (62.2-67.8)    | 1.8 (1.7-2.0)   |
|              | Less accessible   | 132.7 (125.5-139.9)  | 2.3 (2.1-2.4)     | 84.4 (78.9-89.9)    | 2.4 (2.2-2.6)   |
|              | Remote            | 229.0 (215.2-242.8)  | 3.9 (3.7-4.2)     | 111.2( 101.9-120.5) | 3.2 (2.9-3.5)   |
|              | Very Remote       | 454.4 (414.8-494.0)  | 7.7 (7.1-8.5)     | 234.8 (207.0-262.5) | 6.7 (5.9-7.5)   |
| <b>34-64</b> | Easily accessible | 34.9 (34.1-35.8)     | ref               | 29.0 (28.2-29.8)    | ref             |
|              | Accessible        | 62.1 (60.2-64.1)     | 1.8 (1.7-1.9)     | 46.3 (44.6-48.0)    | 1.6 (1.5-1.7)   |
|              | Less accessible   | 80.2 (76.6-83.7)     | 2.3 (2.2-2.4)     | 54.4 (51.5-57.3)    | 1.9 (1.8-2.0)   |
|              | Remote            | 87.2 (81.9-92.5)     | 2.5 (2.3-2.7)     | 56.6 (52.3-60.8)    | 2.0 (1.8-2.1)   |
|              | Very Remote       | 155.3 (137.4-173.1)  | 4.4 (4.0-5.0)     | 87.6 (74.5-100.7)   | 3.0 (2.6-3.5)   |
| <b>65+</b>   | Easily accessible | 18.3 (17.4-19.3)     | ref               | 19.7 (18.6-20.8)    | ref             |
|              | Accessible        | 22.3 (20.6-24.0)     | 1.2 (1.1-1.3)     | 24.7 (22.8-26.6)    | 1.3 (1.1-1.4)   |
|              | Less accessible   | 23.4 (20.7-26.1)     | 1.3 (1.1-1.4)     | 25.4 (22.4-28.3)    | 1.3 (1.1-1.5)   |
|              | Remote            | 17.1 (13.7-20.5)     | 0.9 (0.8-1.1)     | 23.3 (19.2-27.4)    | 1.2 (1.0-1.4)   |
|              | Very Remote       | 8.4 (1.0-15.7)       | 0.5 (0.2-1.1)     | 16.2 (6.2-26.3)     | 0.8 (0.4-1.5)   |

Abbreviations: RR: Rate ratio; CI: confidence interval
